# Supplementary material for: Deprivation-specific life tables using multivariable flexible modelling – trends from 2000–2002 to 2010–2012, Portugal
Source: PubMed Central journal article supplement (PMC6407195; doi:10.1186/s12889-019-6579-6), 2019-03-07
Supplement: 12889_2019_6579_MOESM3_ESM.pdf [file 12889_2019_6579_MOESM3_ESM.pdf]

**Table S2 - Life tables by deprivation quintile (1-Least deprived) for women in the period 2000-2002 (m\_x - mortality rate; e\_x - life expectancy at age x).**

| age | EDI = 1 |      | EDI = 2 |      | EDI = 3 |      | EDI = 4 |      | EDI = 5 |      |
|-----|---------|------|---------|------|---------|------|---------|------|---------|------|
|     | m_x     | e_x  | m_x     | e_x  | m_x     | e_x  | m_x     | e_x  | m_x     | e_x  |
| 0   | 407,7   | 81,6 | 429,3   | 81,0 | 458,9   | 80,8 | 482,9   | 80,8 | 515,3   | 80,6 |
| 1   | 44,1    | 80,9 | 46,4    | 80,4 | 49,6    | 80,2 | 52,1    | 80,2 | 55,6    | 80,0 |
| 2   | 27,8    | 79,9 | 29,3    | 79,4 | 31,3    | 79,2 | 32,9    | 79,3 | 35,0    | 79,1 |
| 3   | 26,5    | 78,9 | 27,9    | 78,4 | 29,7    | 78,2 | 31,2    | 78,3 | 33,2    | 78,1 |
| 4   | 24,3    | 78,0 | 25,6    | 77,5 | 27,3    | 77,3 | 28,7    | 77,3 | 30,5    | 77,1 |
| 5   | 21,9    | 77,0 | 23,0    | 76,5 | 24,6    | 76,3 | 25,7    | 76,3 | 27,4    | 76,2 |
| 6   | 19,5    | 76,0 | 20,5    | 75,5 | 21,8    | 75,3 | 22,9    | 75,3 | 24,3    | 75,2 |
| 7   | 17,3    | 75,0 | 18,3    | 74,5 | 19,4    | 74,3 | 20,3    | 74,4 | 21,6    | 74,2 |
| 8   | 15,6    | 74,0 | 16,5    | 73,5 | 17,5    | 73,3 | 18,3    | 73,4 | 19,4    | 73,2 |
| 9   | 14,4    | 73,0 | 15,2    | 72,5 | 16,2    | 72,3 | 16,9    | 72,4 | 17,9    | 72,2 |
| 10  | 13,8    | 72,0 | 14,5    | 71,5 | 15,4    | 71,4 | 16,1    | 71,4 | 17,1    | 71,2 |
| 11  | 13,7    | 71,1 | 14,5    | 70,6 | 15,4    | 70,4 | 16,0    | 70,4 | 17,0    | 70,2 |
| 12  | 14,2    | 70,1 | 15,0    | 69,6 | 15,9    | 69,4 | 16,6    | 69,4 | 17,6    | 69,3 |
| 13  | 15,2    | 69,1 | 16,1    | 68,6 | 17,0    | 68,4 | 17,7    | 68,4 | 18,7    | 68,3 |
| 14  | 16,7    | 68,1 | 17,6    | 67,6 | 18,6    | 67,4 | 19,4    | 67,5 | 20,5    | 67,3 |
| 15  | 18,6    | 67,1 | 19,6    | 66,6 | 20,8    | 66,4 | 21,6    | 66,5 | 22,8    | 66,3 |
| 16  | 21,0    | 66,1 | 22,1    | 65,6 | 23,4    | 65,4 | 24,3    | 65,5 | 25,6    | 65,3 |
| 17  | 23,7    | 65,1 | 25,0    | 64,6 | 26,4    | 64,4 | 27,4    | 64,5 | 28,9    | 64,3 |
| 18  | 26,7    | 64,1 | 28,1    | 63,6 | 29,7    | 63,5 | 30,8    | 63,5 | 32,5    | 63,3 |
| 19  | 29,7    | 63,2 | 31,3    | 62,7 | 33,0    | 62,5 | 34,2    | 62,5 | 36,1    | 62,4 |
| 20  | 32,4    | 62,2 | 34,2    | 61,7 | 36,1    | 61,5 | 37,3    | 61,6 | 39,3    | 61,4 |
| 21  | 34,6    | 61,2 | 36,5    | 60,7 | 38,4    | 60,5 | 39,8    | 60,6 | 41,8    | 60,4 |
| 22  | 36,1    | 60,2 | 38,1    | 59,7 | 40,1    | 59,5 | 41,5    | 59,6 | 43,6    | 59,4 |
| 23  | 37,1    | 59,2 | 39,2    | 58,7 | 41,2    | 58,6 | 42,6    | 58,6 | 44,7    | 58,5 |
| 24  | 37,7    | 58,3 | 39,8    | 57,8 | 41,9    | 57,6 | 43,2    | 57,6 | 45,4    | 57,5 |
| 25  | 38,1    | 57,3 | 40,2    | 56,8 | 42,3    | 56,6 | 43,6    | 56,7 | 45,7    | 56,5 |
| 26  | 38,4    | 56,3 | 40,5    | 55,8 | 42,6    | 55,6 | 43,9    | 55,7 | 46,0    | 55,5 |
| 27  | 38,9    | 55,3 | 41,0    | 54,8 | 43,0    | 54,7 | 44,3    | 54,7 | 46,4    | 54,6 |
| 28  | 39,6    | 54,3 | 41,8    | 53,9 | 43,8    | 53,7 | 45,1    | 53,7 | 47,2    | 53,6 |
| 29  | 40,9    | 53,4 | 43,1    | 52,9 | 45,2    | 52,7 | 46,5    | 52,8 | 48,6    | 52,6 |
| 30  | 42,9    | 52,4 | 45,3    | 51,9 | 47,5    | 51,7 | 48,7    | 51,8 | 50,9    | 51,6 |
| 31  | 46,0    | 51,4 | 48,6    | 50,9 | 50,9    | 50,8 | 52,2    | 50,8 | 54,5    | 50,7 |
| 32  | 50,3    | 50,4 | 53,0    | 50,0 | 55,5    | 49,8 | 56,9    | 49,8 | 59,4    | 49,7 |
| 33  | 55,7    | 49,5 | 58,8    | 49,0 | 61,5    | 48,8 | 63,0    | 48,9 | 65,7    | 48,7 |
| 34  | 62,5    | 48,5 | 65,9    | 48,0 | 68,9    | 47,8 | 70,5    | 47,9 | 73,5    | 47,8 |
| 35  | 70,6    | 47,5 | 74,5    | 47,0 | 77,8    | 46,9 | 79,5    | 46,9 | 82,9    | 46,8 |
| 36  | 80,0    | 46,6 | 84,4    | 46,1 | 88,1    | 45,9 | 90,0    | 46,0 | 93,8    | 45,8 |
| 37  | 90,7    | 45,6 | 95,7    | 45,1 | 99,9    | 44,9 | 101,9   | 45,0 | 106,1   | 44,9 |
| 38  | 102,5   | 44,6 | 108,2   | 44,2 | 112,8   | 44,0 | 115,0   | 44,1 | 119,6   | 43,9 |
| 39  | 115,0   | 43,7 | 121,4   | 43,2 | 126,4   | 43,0 | 128,8   | 43,1 | 133,9   | 43,0 |
| 40  | 127,6   | 42,7 | 134,7   | 42,3 | 140,2   | 42,1 | 142,8   | 42,2 | 148,3   | 42,0 |
| 41  | 139,6   | 41,8 | 147,4   | 41,3 | 153,4   | 41,2 | 156,1   | 41,2 | 162,0   | 41,1 |
| 42  | 150,9   | 40,8 | 159,4   | 40,4 | 165,7   | 40,2 | 168,4   | 40,3 | 174,7   | 40,2 |
| 43  | 161,4   | 39,9 | 170,4   | 39,4 | 177,1   | 39,3 | 179,9   | 39,4 | 186,5   | 39,2 |
| 44  | 171,2   | 39,0 | 180,7   | 38,5 | 187,7   | 38,4 | 190,5   | 38,4 | 197,3   | 38,3 |
| 45  | 180,3   | 38,0 | 190,4   | 37,6 | 197,5   | 37,4 | 200,3   | 37,5 | 207,4   | 37,4 |
| 46  | 189,0   | 37,1 | 199,6   | 36,6 | 207,0   | 36,5 | 209,7   | 36,6 | 216,9   | 36,4 |
| 47  | 197,6   | 36,2 | 208,7   | 35,7 | 216,2   | 35,6 | 218,9   | 35,6 | 226,3   | 35,5 |
| 48  | 206,4   | 35,2 | 218,0   | 34,8 | 225,8   | 34,6 | 228,4   | 34,7 | 236,0   | 34,6 |
| 49  | 215,9   | 34,3 | 228,1   | 33,9 | 236,0   | 33,7 | 238,6   | 33,8 | 246,3   | 33,7 |

**Table S2 (cont.) - Life tables by deprivation quintile (1-Least deprived) for women in the period 2000-2002 (m<sub>x</sub> - mortality rate; e<sub>x</sub> - life expectancy at age x).**

| age | EDI = 1        |                | EDI = 2        |                | EDI = 3        |                | EDI = 4        |                | EDI = 5        |                |
|-----|----------------|----------------|----------------|----------------|----------------|----------------|----------------|----------------|----------------|----------------|
|     | m <sub>x</sub> | e <sub>x</sub> | m <sub>x</sub> | e <sub>x</sub> | m <sub>x</sub> | e <sub>x</sub> | m <sub>x</sub> | e <sub>x</sub> | m <sub>x</sub> | e <sub>x</sub> |
| 50  | 226,6          | 33,4           | 239,4          | 32,9           | 247,6          | 32,8           | 250,0          | 32,9           | 257,9          | 32,8           |
| 51  | 239,0          | 32,5           | 252,4          | 32,0           | 260,9          | 31,9           | 263,3          | 32,0           | 271,4          | 31,9           |
| 52  | 253,2          | 31,5           | 267,5          | 31,1           | 276,3          | 31,0           | 278,6          | 31,0           | 287,1          | 30,9           |
| 53  | 269,7          | 30,6           | 285,0          | 30,2           | 294,1          | 30,0           | 296,3          | 30,1           | 305,1          | 30,0           |
| 54  | 288,6          | 29,7           | 304,9          | 29,3           | 314,5          | 29,1           | 316,6          | 29,2           | 325,7          | 29,1           |
| 55  | 310,2          | 28,8           | 327,7          | 28,3           | 337,8          | 28,2           | 339,8          | 28,3           | 349,4          | 28,2           |
| 56  | 334,8          | 27,9           | 353,8          | 27,4           | 364,5          | 27,3           | 366,3          | 27,4           | 376,4          | 27,3           |
| 57  | 362,9          | 27,0           | 383,5          | 26,5           | 394,8          | 26,4           | 396,4          | 26,5           | 407,1          | 26,4           |
| 58  | 394,9          | 26,1           | 417,4          | 25,6           | 429,4          | 25,5           | 430,8          | 25,6           | 442,1          | 25,5           |
| 59  | 431,4          | 25,2           | 456,0          | 24,7           | 468,8          | 24,6           | 470,0          | 24,7           | 482,0          | 24,6           |
| 60  | 473,0          | 24,3           | 500,0          | 23,9           | 513,7          | 23,7           | 514,6          | 23,8           | 527,3          | 23,7           |
| 61  | 520,4          | 23,4           | 550,2          | 23,0           | 564,9          | 22,9           | 565,3          | 23,0           | 579,0          | 22,9           |
| 62  | 574,5          | 22,5           | 607,3          | 22,1           | 623,1          | 22,0           | 623,1          | 22,1           | 637,7          | 22,0           |
| 63  | 636,1          | 21,6           | 672,5          | 21,2           | 689,6          | 21,1           | 689,0          | 21,2           | 704,7          | 21,1           |
| 64  | 706,4          | 20,8           | 746,9          | 20,4           | 765,3          | 20,3           | 764,1          | 20,4           | 780,9          | 20,3           |
| 65  | 786,6          | 19,9           | 831,8          | 19,5           | 851,8          | 19,4           | 849,7          | 19,5           | 867,8          | 19,4           |
| 66  | 878,3          | 19,0           | 928,7          | 18,7           | 950,4          | 18,6           | 947,3          | 18,7           | 966,9          | 18,6           |
| 67  | 983,0          | 18,2           | 1039,5         | 17,8           | 1063,1         | 17,7           | 1058,7         | 17,8           | 1079,9         | 17,8           |
| 68  | 1102,6         | 17,4           | 1166,1         | 17,0           | 1191,8         | 16,9           | 1185,9         | 17,0           | 1208,8         | 17,0           |
| 69  | 1239,4         | 16,6           | 1310,8         | 16,2           | 1338,8         | 16,1           | 1331,1         | 16,2           | 1355,8         | 16,2           |
| 70  | 1395,7         | 15,8           | 1476,3         | 15,4           | 1506,8         | 15,3           | 1496,9         | 15,4           | 1523,7         | 15,4           |
| 71  | 1574,5         | 15,0           | 1665,5         | 14,6           | 1698,8         | 14,6           | 1686,2         | 14,7           | 1715,3         | 14,6           |
| 72  | 1779,0         | 14,2           | 1881,9         | 13,9           | 1918,2         | 13,8           | 1902,5         | 13,9           | 1934,0         | 13,8           |
| 73  | 2012,7         | 13,5           | 2129,3         | 13,1           | 2169,0         | 13,1           | 2149,4         | 13,2           | 2183,5         | 13,1           |
| 74  | 2279,9         | 12,7           | 2412,2         | 12,4           | 2455,5         | 12,3           | 2431,3         | 12,4           | 2468,3         | 12,4           |
| 75  | 2585,3         | 12,0           | 2735,4         | 11,7           | 2782,7         | 11,6           | 2753,0         | 11,7           | 2793,0         | 11,7           |
| 76  | 2934,0         | 11,3           | 3104,6         | 11,0           | 3156,2         | 10,9           | 3120,0         | 11,0           | 3163,1         | 11,0           |
| 77  | 3332,0         | 10,6           | 3526,0         | 10,3           | 3582,2         | 10,3           | 3538,2         | 10,4           | 3584,7         | 10,3           |
| 78  | 3786,0         | 10,0           | 4006,6         | 9,7            | 4067,9         | 9,6            | 4014,5         | 9,7            | 4064,6         | 9,7            |
| 79  | 4303,2         | 9,3            | 4554,3         | 9,1            | 4620,8         | 9,0            | 4556,5         | 9,1            | 4610,2         | 9,1            |
| 80  | 4891,8         | 8,7            | 5177,6         | 8,5            | 5249,8         | 8,4            | 5172,5         | 8,5            | 5229,9         | 8,5            |
| 81  | 5560,8         | 8,1            | 5886,2         | 7,9            | 5964,3         | 7,9            | 5871,6         | 7,9            | 5932,8         | 7,9            |
| 82  | 6320,2         | 7,6            | 6690,4         | 7,3            | 6774,7         | 7,3            | 6663,9         | 7,4            | 6728,9         | 7,4            |
| 83  | 7180,6         | 7,0            | 7601,7         | 6,8            | 7692,4         | 6,8            | 7560,4         | 6,9            | 7629,0         | 6,8            |
| 84  | 8153,8         | 6,5            | 8632,5         | 6,3            | 8729,7         | 6,3            | 8572,9         | 6,4            | 8644,8         | 6,3            |
| 85  | 9252,3         | 6,0            | 9796,2         | 5,8            | 9899,9         | 5,8            | 9714,0         | 5,9            | 9789,0         | 5,9            |
| 86  | 10489,5        | 5,6            | 11106,8        | 5,4            | 11217,0        | 5,4            | 10997,3        | 5,4            | 11074,8        | 5,4            |
| 87  | 11879,5        | 5,1            | 12579,4        | 5,0            | 12695,9        | 4,9            | 12437,0        | 5,0            | 12516,1        | 5,0            |
| 88  | 13437,1        | 4,7            | 14229,8        | 4,6            | 14352,0        | 4,5            | 14047,8        | 4,6            | 14127,7        | 4,6            |
| 89  | 15177,6        | 4,3            | 16074,0        | 4,2            | 16201,4        | 4,2            | 15844,8        | 4,2            | 15924,3        | 4,2            |
| 90  | 17121,4        | 4,0            | 18133,8        | 3,8            | 18265,5        | 3,8            | 17848,8        | 3,9            | 17926,2        | 3,9            |
| 91  | 19309,1        | 3,6            | 20452,2        | 3,5            | 20587,1        | 3,5            | 20100,9        | 3,5            | 20174,6        | 3,5            |
| 92  | 21776,3        | 3,3            | 23067,0        | 3,2            | 23203,9        | 3,1            | 22637,2        | 3,2            | 22704,9        | 3,2            |
| 93  | 24558,8        | 3,0            | 26016,1        | 2,8            | 26153,2        | 2,8            | 25493,5        | 2,9            | 25552,5        | 2,9            |
| 94  | 27696,8        | 2,6            | 29342,3        | 2,5            | 29477,4        | 2,5            | 28710,2        | 2,6            | 28757,4        | 2,6            |
| 95  | 31235,8        | 2,3            | 33093,7        | 2,2            | 33224,1        | 2,2            | 32332,8        | 2,3            | 32364,1        | 2,3            |
| 96  | 35227,0        | 2,0            | 37324,7        | 1,9            | 37447,1        | 1,9            | 36412,4        | 1,9            | 36423,3        | 1,9            |
| 97  | 39728,1        | 1,6            | 42096,7        | 1,6            | 42206,8        | 1,6            | 41006,9        | 1,6            | 40991,5        | 1,6            |
| 98  | 44804,4        | 1,1            | 47478,8        | 1,1            | 47571,6        | 1,1            | 46181,0        | 1,1            | 46132,7        | 1,1            |
| 99  | 50529,3        | 0,5            | 53548,9        | 0,5            | 53618,2        | 0,5            | 52008,0        | 0,5            | 51918,7        | 0,5            |
