# Supplementary material for: Deprivation-specific life tables using multivariable flexible modelling – trends from 2000–2002 to 2010–2012, Portugal
Source: PubMed Central journal article supplement (PMC6407195; doi:10.1186/s12889-019-6579-6), 2019-03-07
Supplement: 12889_2019_6579_MOESM5_ESM.pdf [file 12889_2019_6579_MOESM5_ESM.pdf]

**Table S4 - Life tables by deprivation quintile (1-Least deprived) for women in the period 2010-2012 (m\_x - mortality rate; e\_x - life expectancy at age x).**

| age | EDI = 1 |      | EDI = 2 |      | EDI = 3 |      | EDI = 4 |      | EDI = 5 |      |
|-----|---------|------|---------|------|---------|------|---------|------|---------|------|
|     | m_x     | e_x  | m_x     | e_x  | m_x     | e_x  | m_x     | e_x  | m_x     | e_x  |
| 0   | 263,6   | 84,3 | 278,3   | 83,8 | 301,2   | 83,6 | 316,3   | 83,6 | 339,4   | 83,4 |
| 1   | 28,5    | 83,6 | 30,1    | 83,1 | 32,5    | 82,8 | 34,1    | 82,9 | 36,6    | 82,7 |
| 2   | 18,0    | 82,6 | 19,0    | 82,1 | 20,5    | 81,8 | 21,5    | 81,9 | 23,1    | 81,7 |
| 3   | 17,1    | 81,6 | 18,1    | 81,1 | 19,5    | 80,8 | 20,4    | 80,9 | 21,9    | 80,7 |
| 4   | 15,7    | 80,6 | 16,6    | 80,1 | 17,9    | 79,9 | 18,8    | 79,9 | 20,1    | 79,8 |
| 5   | 14,1    | 79,6 | 14,9    | 79,1 | 16,1    | 78,9 | 16,8    | 79,0 | 18,0    | 78,8 |
| 6   | 12,6    | 78,6 | 13,3    | 78,2 | 14,3    | 77,9 | 15,0    | 78,0 | 16,0    | 77,8 |
| 7   | 11,2    | 77,7 | 11,8    | 77,2 | 12,8    | 76,9 | 13,3    | 77,0 | 14,2    | 76,8 |
| 8   | 10,1    | 76,7 | 10,7    | 76,2 | 11,5    | 75,9 | 12,0    | 76,0 | 12,8    | 75,8 |
| 9   | 9,3     | 75,7 | 9,8     | 75,2 | 10,6    | 74,9 | 11,0    | 75,0 | 11,8    | 74,8 |
| 10  | 8,9     | 74,7 | 9,4     | 74,2 | 10,1    | 73,9 | 10,5    | 74,0 | 11,2    | 73,8 |
| 11  | 8,9     | 73,7 | 9,4     | 73,2 | 10,1    | 72,9 | 10,5    | 73,0 | 11,2    | 72,8 |
| 12  | 9,2     | 72,7 | 9,7     | 72,2 | 10,4    | 71,9 | 10,9    | 72,0 | 11,6    | 71,8 |
| 13  | 9,8     | 71,7 | 10,4    | 71,2 | 11,2    | 70,9 | 11,6    | 71,0 | 12,3    | 70,8 |
| 14  | 10,8    | 70,7 | 11,4    | 70,2 | 12,2    | 70,0 | 12,7    | 70,0 | 13,5    | 69,9 |
| 15  | 12,0    | 69,7 | 12,7    | 69,2 | 13,6    | 69,0 | 14,1    | 69,1 | 15,0    | 68,9 |
| 16  | 13,6    | 68,7 | 14,3    | 68,2 | 15,4    | 68,0 | 15,9    | 68,1 | 16,9    | 67,9 |
| 17  | 15,3    | 67,7 | 16,2    | 67,2 | 17,3    | 67,0 | 18,0    | 67,1 | 19,0    | 66,9 |
| 18  | 17,2    | 66,7 | 18,2    | 66,3 | 19,5    | 66,0 | 20,2    | 66,1 | 21,4    | 65,9 |
| 19  | 19,2    | 65,8 | 20,3    | 65,3 | 21,7    | 65,0 | 22,4    | 65,1 | 23,8    | 64,9 |
| 20  | 21,0    | 64,8 | 22,2    | 64,3 | 23,7    | 64,0 | 24,5    | 64,1 | 25,9    | 63,9 |
| 21  | 22,4    | 63,8 | 23,7    | 63,3 | 25,3    | 63,0 | 26,1    | 63,1 | 27,6    | 62,9 |
| 22  | 23,4    | 62,8 | 24,7    | 62,3 | 26,4    | 62,1 | 27,2    | 62,1 | 28,8    | 62,0 |
| 23  | 24,1    | 61,8 | 25,4    | 61,3 | 27,1    | 61,1 | 27,9    | 61,2 | 29,5    | 61,0 |
| 24  | 24,5    | 60,8 | 25,9    | 60,3 | 27,6    | 60,1 | 28,4    | 60,2 | 30,0    | 60,0 |
| 25  | 24,7    | 59,8 | 26,1    | 59,4 | 27,8    | 59,1 | 28,6    | 59,2 | 30,2    | 59,0 |
| 26  | 24,9    | 58,9 | 26,4    | 58,4 | 28,1    | 58,1 | 28,8    | 58,2 | 30,4    | 58,0 |
| 27  | 25,2    | 57,9 | 26,7    | 57,4 | 28,4    | 57,1 | 29,1    | 57,2 | 30,7    | 57,1 |
| 28  | 25,7    | 56,9 | 27,2    | 56,4 | 28,9    | 56,2 | 29,7    | 56,2 | 31,3    | 56,1 |
| 29  | 26,6    | 55,9 | 28,1    | 55,4 | 29,9    | 55,2 | 30,6    | 55,3 | 32,2    | 55,1 |
| 30  | 28,0    | 54,9 | 29,6    | 54,4 | 31,4    | 54,2 | 32,1    | 54,3 | 33,8    | 54,1 |
| 31  | 30,0    | 53,9 | 31,7    | 53,4 | 33,7    | 53,2 | 34,4    | 53,3 | 36,2    | 53,1 |
| 32  | 32,8    | 52,9 | 34,7    | 52,5 | 36,8    | 52,2 | 37,6    | 52,3 | 39,5    | 52,1 |
| 33  | 36,4    | 52,0 | 38,5    | 51,5 | 40,8    | 51,2 | 41,7    | 51,3 | 43,8    | 51,2 |
| 34  | 40,9    | 51,0 | 43,2    | 50,5 | 45,8    | 50,3 | 46,7    | 50,4 | 49,0    | 50,2 |
| 35  | 46,2    | 50,0 | 48,9    | 49,5 | 51,7    | 49,3 | 52,8    | 49,4 | 55,3    | 49,2 |
| 36  | 52,5    | 49,0 | 55,5    | 48,6 | 58,7    | 48,3 | 59,8    | 48,4 | 62,7    | 48,2 |
| 37  | 59,6    | 48,0 | 63,1    | 47,6 | 66,6    | 47,3 | 67,8    | 47,4 | 71,0    | 47,3 |
| 38  | 67,4    | 47,1 | 71,4    | 46,6 | 75,3    | 46,4 | 76,7    | 46,5 | 80,2    | 46,3 |
| 39  | 75,8    | 46,1 | 80,2    | 45,6 | 84,6    | 45,4 | 86,0    | 45,5 | 89,9    | 45,3 |
| 40  | 84,2    | 45,1 | 89,2    | 44,7 | 94,0    | 44,4 | 95,5    | 44,5 | 99,8    | 44,4 |
| 41  | 92,4    | 44,2 | 97,8    | 43,7 | 103,0   | 43,5 | 104,6   | 43,6 | 109,2   | 43,4 |
| 42  | 100,1   | 43,2 | 105,9   | 42,8 | 111,5   | 42,5 | 113,1   | 42,6 | 118,0   | 42,5 |
| 43  | 107,2   | 42,3 | 113,5   | 41,8 | 119,4   | 41,6 | 121,0   | 41,7 | 126,2   | 41,5 |
| 44  | 114,0   | 41,3 | 120,6   | 40,8 | 126,9   | 40,6 | 128,4   | 40,7 | 133,8   | 40,6 |
| 45  | 120,3   | 40,4 | 127,4   | 39,9 | 133,8   | 39,7 | 135,4   | 39,8 | 141,0   | 39,6 |
| 46  | 126,4   | 39,4 | 133,9   | 38,9 | 140,6   | 38,7 | 142,1   | 38,8 | 147,9   | 38,7 |
| 47  | 132,5   | 38,4 | 140,3   | 38,0 | 147,2   | 37,8 | 148,7   | 37,9 | 154,7   | 37,7 |
| 48  | 138,8   | 37,5 | 147,0   | 37,1 | 154,1   | 36,8 | 155,6   | 36,9 | 161,7   | 36,8 |
| 49  | 145,6   | 36,6 | 154,2   | 36,1 | 161,6   | 35,9 | 162,9   | 36,0 | 169,2   | 35,9 |

**Table S4 (cont.) - Life tables by deprivation quintile (1-Least deprived) for women in the period 2010-2012 (m\_x - mortality rate; e\_x - life expectancy at age x).**

| age | EDI = 1 |      | EDI = 2 |      | EDI = 3 |      | EDI = 4 |      | EDI = 5 |      |
|-----|---------|------|---------|------|---------|------|---------|------|---------|------|
|     | m_x     | e_x  | m_x     | e_x  | m_x     | e_x  | m_x     | e_x  | m_x     | e_x  |
| 50  | 153,2   | 35,6 | 162,2   | 35,2 | 169,9   | 34,9 | 171,2   | 35,1 | 177,7   | 34,9 |
| 51  | 162,0   | 34,7 | 171,6   | 34,2 | 179,6   | 34,0 | 180,8   | 34,1 | 187,5   | 34,0 |
| 52  | 172,2   | 33,7 | 182,4   | 33,3 | 190,8   | 33,1 | 191,9   | 33,2 | 198,9   | 33,0 |
| 53  | 184,0   | 32,8 | 194,9   | 32,3 | 203,7   | 32,1 | 204,7   | 32,2 | 212,0   | 32,1 |
| 54  | 197,5   | 31,8 | 209,2   | 31,4 | 218,5   | 31,2 | 219,4   | 31,3 | 227,1   | 31,2 |
| 55  | 212,9   | 30,9 | 225,6   | 30,5 | 235,5   | 30,3 | 236,3   | 30,4 | 244,4   | 30,2 |
| 56  | 230,6   | 30,0 | 244,3   | 29,5 | 254,9   | 29,3 | 255,5   | 29,4 | 264,1   | 29,3 |
| 57  | 250,8   | 29,0 | 265,7   | 28,6 | 277,0   | 28,4 | 277,5   | 28,5 | 286,7   | 28,4 |
| 58  | 273,9   | 28,1 | 290,2   | 27,7 | 302,3   | 27,5 | 302,6   | 27,6 | 312,4   | 27,5 |
| 59  | 300,2   | 27,2 | 318,1   | 26,8 | 331,3   | 26,6 | 331,3   | 26,7 | 341,7   | 26,5 |
| 60  | 330,3   | 26,3 | 350,1   | 25,8 | 364,3   | 25,6 | 364,0   | 25,8 | 375,2   | 25,6 |
| 61  | 364,8   | 25,3 | 386,6   | 24,9 | 402,0   | 24,7 | 401,4   | 24,9 | 413,5   | 24,7 |
| 62  | 404,1   | 24,4 | 428,4   | 24,0 | 445,1   | 23,8 | 444,1   | 24,0 | 457,2   | 23,8 |
| 63  | 449,2   | 23,5 | 476,1   | 23,1 | 494,4   | 22,9 | 492,9   | 23,1 | 507,1   | 22,9 |
| 64  | 500,8   | 22,6 | 530,8   | 22,2 | 550,9   | 22,1 | 548,7   | 22,2 | 564,1   | 22,1 |
| 65  | 559,8   | 21,7 | 593,5   | 21,3 | 615,5   | 21,2 | 612,5   | 21,3 | 629,3   | 21,2 |
| 66  | 627,5   | 20,9 | 665,3   | 20,5 | 689,5   | 20,3 | 685,6   | 20,4 | 703,9   | 20,3 |
| 67  | 705,1   | 20,0 | 747,6   | 19,6 | 774,3   | 19,4 | 769,3   | 19,6 | 789,3   | 19,4 |
| 68  | 794,1   | 19,1 | 842,1   | 18,7 | 871,5   | 18,6 | 865,2   | 18,7 | 887,1   | 18,6 |
| 69  | 896,3   | 18,3 | 950,5   | 17,9 | 983,1   | 17,7 | 975,1   | 17,9 | 999,1   | 17,8 |
| 70  | 1013,6  | 17,4 | 1074,9  | 17,1 | 1111,0  | 16,9 | 1101,1  | 17,0 | 1127,5  | 16,9 |
| 71  | 1148,2  | 16,6 | 1217,7  | 16,2 | 1257,9  | 16,1 | 1245,7  | 16,2 | 1274,6  | 16,1 |
| 72  | 1302,8  | 15,8 | 1381,8  | 15,4 | 1426,4  | 15,3 | 1411,4  | 15,4 | 1443,2  | 15,3 |
| 73  | 1480,3  | 15,0 | 1570,2  | 14,6 | 1619,8  | 14,5 | 1601,4  | 14,6 | 1636,5  | 14,5 |
| 74  | 1684,1  | 14,2 | 1786,4  | 13,9 | 1841,7  | 13,7 | 1819,3  | 13,8 | 1857,8  | 13,8 |
| 75  | 1918,0  | 13,4 | 2034,6  | 13,1 | 2096,2  | 13,0 | 2069,0  | 13,1 | 2111,4  | 13,0 |
| 76  | 2186,2  | 12,7 | 2319,4  | 12,4 | 2388,0  | 12,2 | 2355,0  | 12,4 | 2401,7  | 12,3 |
| 77  | 2493,8  | 12,0 | 2645,9  | 11,6 | 2722,3  | 11,5 | 2682,5  | 11,6 | 2733,9  | 11,6 |
| 78  | 2846,2  | 11,3 | 3019,9  | 10,9 | 3105,1  | 10,8 | 3057,2  | 10,9 | 3113,6  | 10,9 |
| 79  | 3249,5  | 10,6 | 3448,1  | 10,3 | 3543,0  | 10,2 | 3485,4  | 10,3 | 3547,4  | 10,2 |
| 80  | 3710,6  | 9,9  | 3937,6  | 9,6  | 4043,3  | 9,5  | 3974,4  | 9,6  | 4042,4  | 9,6  |
| 81  | 4237,2  | 9,2  | 4496,7  | 9,0  | 4614,4  | 8,9  | 4532,0  | 9,0  | 4606,4  | 8,9  |
| 82  | 4837,7  | 8,6  | 5134,3  | 8,4  | 5265,2  | 8,3  | 5166,9  | 8,4  | 5248,2  | 8,3  |
| 83  | 5521,4  | 8,0  | 5860,3  | 7,8  | 6005,7  | 7,7  | 5888,8  | 7,8  | 5977,4  | 7,7  |
| 84  | 6298,4  | 7,5  | 6685,5  | 7,2  | 6846,8  | 7,1  | 6708,0  | 7,2  | 6804,4  | 7,2  |
| 85  | 7179,7  | 6,9  | 7621,5  | 6,7  | 7800,3  | 6,6  | 7635,8  | 6,7  | 7740,3  | 6,7  |
| 86  | 8177,2  | 6,4  | 8680,9  | 6,2  | 8878,7  | 6,1  | 8684,4  | 6,2  | 8797,3  | 6,2  |
| 87  | 9303,5  | 5,9  | 9877,3  | 5,7  | 10095,6 | 5,6  | 9866,5  | 5,7  | 9988,1  | 5,7  |
| 88  | 10572,0 | 5,4  | 11224,7 | 5,2  | 11465,3 | 5,2  | 11195,9 | 5,3  | 11326,2 | 5,2  |
| 89  | 11996,5 | 5,0  | 12738,1 | 4,8  | 13002,5 | 4,7  | 12686,5 | 4,8  | 12825,6 | 4,8  |
| 90  | 13595,6 | 4,5  | 14436,9 | 4,4  | 14726,8 | 4,3  | 14357,1 | 4,4  | 14504,8 | 4,4  |
| 91  | 15403,7 | 4,1  | 16358,0 | 4,0  | 16675,5 | 3,9  | 16243,4 | 4,0  | 16399,5 | 4,0  |
| 92  | 17452,2 | 3,7  | 18534,7 | 3,6  | 18882,0 | 3,6  | 18377,6 | 3,6  | 18541,7 | 3,6  |
| 93  | 19773,2 | 3,3  | 21001,0 | 3,2  | 21380,4 | 3,2  | 20792,2 | 3,2  | 20963,7 | 3,2  |
| 94  | 22402,9 | 3,0  | 23795,6 | 2,9  | 24209,4 | 2,8  | 23524,0 | 2,9  | 23702,1 | 2,9  |
| 95  | 25382,3 | 2,6  | 26962,0 | 2,5  | 27412,8 | 2,5  | 26614,7 | 2,5  | 26798,2 | 2,5  |
| 96  | 28758,0 | 2,2  | 30549,7 | 2,1  | 31040,0 | 2,1  | 30111,5 | 2,1  | 30298,8 | 2,1  |
| 97  | 32582,6 | 1,7  | 34614,9 | 1,7  | 35147,2 | 1,7  | 34067,7 | 1,7  | 34256,6 | 1,7  |
| 98  | 36915,8 | 1,2  | 39220,9 | 1,2  | 39797,8 | 1,2  | 38543,8 | 1,2  | 38731,4 | 1,2  |
| 99  | 41825,3 | 0,5  | 44439,9 | 0,5  | 45063,8 | 0,5  | 43607,9 | 0,5  | 43790,8 | 0,5  |
