# Supplementary material for: Deprivation-specific life tables using multivariable flexible modelling – trends from 2000–2002 to 2010–2012, Portugal
Source: Springer Nature journal article supplement (doi:10.1186/s12889-019-6579-6), 2019-03-07
Supplement: MOESM2 [file 16532626]

**Table S1 - Life tables by deprivation quintile (1-Least deprived) for men in the period 2000-2002 (m\_x - mortality rate; e\_x - life expectancy at age x).**

| age | EDI = 1 |      | EDI = 2 |      | EDI = 3 |      | EDI = 4 |      | EDI = 5 |      |
|-----|---------|------|---------|------|---------|------|---------|------|---------|------|
|     | m_x     | e_x  | m_x     | e_x  | m_x     | e_x  | m_x     | e_x  | m_x     | e_x  |
| 0   | 496,1   | 75,1 | 628,8   | 74,0 | 638,1   | 73,8 | 712,8   | 73,6 | 802,9   | 73,3 |
| 1   | 72,8    | 74,5 | 92,0    | 73,5 | 93,4    | 73,3 | 104,2   | 73,1 | 117,1   | 72,9 |
| 2   | 40,5    | 73,5 | 51,0    | 72,5 | 51,8    | 72,3 | 57,7    | 72,2 | 64,7    | 72,0 |
| 3   | 32,3    | 72,6 | 40,6    | 71,6 | 41,2    | 71,4 | 45,8    | 71,2 | 51,4    | 71,0 |
| 4   | 26,7    | 71,6 | 33,5    | 70,6 | 34,0    | 70,4 | 37,8    | 70,3 | 42,3    | 70,1 |
| 5   | 23,0    | 70,6 | 28,8    | 69,6 | 29,2    | 69,4 | 32,3    | 69,3 | 36,1    | 69,1 |
| 6   | 20,5    | 69,6 | 25,6    | 68,7 | 26,0    | 68,5 | 28,7    | 68,3 | 32,0    | 68,1 |
| 7   | 19,0    | 68,6 | 23,7    | 67,7 | 24,0    | 67,5 | 26,5    | 67,3 | 29,5    | 67,1 |
| 8   | 18,3    | 67,7 | 22,8    | 66,7 | 23,1    | 66,5 | 25,5    | 66,4 | 28,3    | 66,2 |
| 9   | 18,4    | 66,7 | 22,8    | 65,7 | 23,1    | 65,5 | 25,5    | 65,4 | 28,2    | 65,2 |
| 10  | 19,2    | 65,7 | 23,7    | 64,7 | 24,1    | 64,5 | 26,5    | 64,4 | 29,3    | 64,2 |
| 11  | 20,8    | 64,7 | 25,7    | 63,7 | 26,1    | 63,5 | 28,6    | 63,4 | 31,6    | 63,2 |
| 12  | 23,4    | 63,7 | 28,8    | 62,8 | 29,2    | 62,5 | 32,0    | 62,4 | 35,3    | 62,2 |
| 13  | 27,0    | 62,7 | 33,1    | 61,8 | 33,6    | 61,6 | 36,8    | 61,5 | 40,5    | 61,3 |
| 14  | 31,7    | 61,7 | 38,9    | 60,8 | 39,5    | 60,6 | 43,1    | 60,5 | 47,4    | 60,3 |
| 15  | 37,8    | 60,8 | 46,2    | 59,8 | 46,9    | 59,6 | 51,1    | 59,5 | 56,1    | 59,3 |
| 16  | 45,3    | 59,8 | 55,2    | 58,8 | 56,1    | 58,6 | 61,0    | 58,5 | 66,8    | 58,4 |
| 17  | 54,2    | 58,8 | 65,9    | 57,9 | 66,9    | 57,7 | 72,7    | 57,6 | 79,5    | 57,4 |
| 18  | 64,3    | 57,8 | 78,0    | 56,9 | 79,2    | 56,7 | 85,9    | 56,6 | 93,8    | 56,4 |
| 19  | 75,2    | 56,9 | 91,0    | 56,0 | 92,4    | 55,8 | 100,0   | 55,7 | 109,1   | 55,5 |
| 20  | 86,0    | 55,9 | 103,7   | 55,0 | 105,4   | 54,8 | 113,9   | 54,7 | 124,0   | 54,5 |
| 21  | 95,6    | 55,0 | 115,1   | 54,1 | 117,0   | 53,9 | 126,2   | 53,8 | 137,1   | 53,6 |
| 22  | 103,8   | 54,0 | 124,6   | 53,1 | 126,6   | 52,9 | 136,4   | 52,8 | 147,9   | 52,7 |
| 23  | 110,3   | 53,1 | 132,1   | 52,2 | 134,3   | 52,0 | 144,4   | 51,9 | 156,3   | 51,8 |
| 24  | 115,3   | 52,1 | 137,8   | 51,3 | 140,0   | 51,1 | 150,3   | 51,0 | 162,5   | 50,8 |
| 25  | 119,0   | 51,2 | 141,9   | 50,3 | 144,2   | 50,1 | 154,5   | 50,1 | 166,8   | 49,9 |
| 26  | 121,9   | 50,3 | 144,9   | 49,4 | 147,3   | 49,2 | 157,6   | 49,1 | 169,8   | 49,0 |
| 27  | 124,2   | 49,3 | 147,4   | 48,5 | 149,8   | 48,3 | 160,0   | 48,2 | 172,1   | 48,1 |
| 28  | 126,7   | 48,4 | 149,9   | 47,5 | 152,4   | 47,3 | 162,5   | 47,3 | 174,4   | 47,2 |
| 29  | 129,7   | 47,4 | 153,1   | 46,6 | 155,6   | 46,4 | 165,7   | 46,4 | 177,6   | 46,3 |
| 30  | 133,9   | 46,5 | 157,7   | 45,7 | 160,3   | 45,5 | 170,4   | 45,4 | 182,3   | 45,3 |
| 31  | 139,9   | 45,6 | 164,3   | 44,8 | 167,0   | 44,6 | 177,2   | 44,5 | 189,3   | 44,4 |
| 32  | 147,7   | 44,6 | 173,0   | 43,8 | 175,9   | 43,6 | 186,3   | 43,6 | 198,7   | 43,5 |
| 33  | 157,3   | 43,7 | 183,9   | 42,9 | 187,0   | 42,7 | 197,7   | 42,7 | 210,5   | 42,6 |
| 34  | 168,9   | 42,8 | 196,9   | 42,0 | 200,2   | 41,8 | 211,3   | 41,8 | 224,6   | 41,7 |
| 35  | 182,2   | 41,8 | 212,0   | 41,1 | 215,5   | 40,9 | 227,2   | 40,9 | 241,0   | 40,8 |
| 36  | 197,5   | 40,9 | 229,1   | 40,1 | 233,0   | 40,0 | 245,1   | 39,9 | 259,6   | 39,9 |
| 37  | 214,4   | 40,0 | 248,2   | 39,2 | 252,4   | 39,1 | 265,1   | 39,0 | 280,3   | 39,0 |
| 38  | 232,9   | 39,1 | 268,9   | 38,3 | 273,5   | 38,2 | 286,8   | 38,1 | 302,7   | 38,1 |
| 39  | 252,7   | 38,2 | 291,0   | 37,4 | 296,0   | 37,3 | 309,9   | 37,2 | 326,5   | 37,2 |
| 40  | 273,3   | 37,2 | 314,0   | 36,5 | 319,4   | 36,4 | 333,8   | 36,4 | 351,1   | 36,3 |
| 41  | 294,3   | 36,4 | 337,3   | 35,7 | 343,1   | 35,5 | 358,0   | 35,5 | 376,0   | 35,4 |
| 42  | 315,7   | 35,5 | 360,9   | 34,8 | 367,1   | 34,6 | 382,4   | 34,6 | 400,9   | 34,6 |
| 43  | 337,5   | 34,6 | 384,9   | 33,9 | 391,5   | 33,7 | 407,2   | 33,7 | 426,1   | 33,7 |
| 44  | 359,8   | 33,7 | 409,3   | 33,0 | 416,4   | 32,9 | 432,3   | 32,9 | 451,7   | 32,8 |
| 45  | 382,8   | 32,8 | 434,5   | 32,2 | 442,0   | 32,0 | 458,1   | 32,0 | 477,8   | 32,0 |
| 46  | 406,8   | 31,9 | 460,5   | 31,3 | 468,6   | 31,1 | 484,9   | 31,2 | 504,8   | 31,1 |
| 47  | 432,0   | 31,1 | 487,9   | 30,4 | 496,4   | 30,3 | 512,9   | 30,3 | 533,1   | 30,3 |
| 48  | 458,9   | 30,2 | 517,0   | 29,6 | 526,0   | 29,4 | 542,5   | 29,5 | 562,9   | 29,5 |
| 49  | 487,8   | 29,3 | 548,2   | 28,7 | 557,8   | 28,6 | 574,4   | 28,6 | 595,0   | 28,6 |

**Table S1 (cont.) - Life tables by deprivation quintile (1-Least deprived) for men in the period 2000-2002**  
**(m<sub>x</sub> - mortality rate; e<sub>x</sub> - life expectancy at age x).**

| age | EDI = 1        |                | EDI = 2        |                | EDI = 3        |                | EDI = 4        |                | EDI = 5        |                |
|-----|----------------|----------------|----------------|----------------|----------------|----------------|----------------|----------------|----------------|----------------|
|     | m <sub>x</sub> | e <sub>x</sub> | m <sub>x</sub> | e <sub>x</sub> | m <sub>x</sub> | e <sub>x</sub> | m <sub>x</sub> | e <sub>x</sub> | m <sub>x</sub> | e <sub>x</sub> |
| 50  | 519,3          | 28,5           | 582,2          | 27,9           | 592,4          | 27,7           | 609,0          | 27,8           | 629,7          | 27,8           |
| 51  | 554,0          | 27,6           | 619,5          | 27,1           | 630,4          | 26,9           | 647,0          | 26,9           | 667,9          | 27,0           |
| 52  | 592,2          | 26,8           | 660,7          | 26,2           | 672,4          | 26,1           | 688,9          | 26,1           | 709,9          | 26,1           |
| 53  | 634,4          | 25,9           | 706,0          | 25,4           | 718,6          | 25,2           | 735,0          | 25,3           | 756,2          | 25,3           |
| 54  | 681,1          | 25,1           | 756,1          | 24,6           | 769,6          | 24,4           | 785,8          | 24,5           | 807,1          | 24,5           |
| 55  | 732,6          | 24,2           | 811,3          | 23,8           | 825,8          | 23,6           | 841,9          | 23,7           | 863,2          | 23,7           |
| 56  | 789,6          | 23,4           | 872,3          | 22,9           | 887,9          | 22,8           | 903,7          | 22,9           | 925,0          | 22,9           |
| 57  | 852,7          | 22,6           | 939,6          | 22,1           | 956,6          | 22,0           | 971,9          | 22,1           | 993,1          | 22,1           |
| 58  | 922,6          | 21,8           | 1014,1         | 21,3           | 1032,4         | 21,2           | 1047,3         | 21,3           | 1068,3         | 21,3           |
| 59  | 1000,0         | 21,0           | 1096,5         | 20,6           | 1116,4         | 20,4           | 1130,5         | 20,5           | 1151,2         | 20,6           |
| 60  | 1085,8         | 20,2           | 1187,7         | 19,8           | 1209,3         | 19,6           | 1222,6         | 19,7           | 1242,9         | 19,8           |
| 61  | 1181,1         | 19,4           | 1288,8         | 19,0           | 1312,3         | 18,9           | 1324,5         | 19,0           | 1344,2         | 19,0           |
| 62  | 1287,0         | 18,6           | 1400,9         | 18,2           | 1426,5         | 18,1           | 1437,4         | 18,2           | 1456,3         | 18,3           |
| 63  | 1404,7         | 17,9           | 1525,3         | 17,5           | 1553,3         | 17,4           | 1562,5         | 17,5           | 1580,3         | 17,5           |
| 64  | 1535,7         | 17,1           | 1663,4         | 16,8           | 1694,0         | 16,6           | 1701,3         | 16,7           | 1717,7         | 16,8           |
| 65  | 1681,5         | 16,4           | 1816,9         | 16,0           | 1850,4         | 15,9           | 1855,3         | 16,0           | 1870,0         | 16,1           |
| 66  | 1844,1         | 15,6           | 1987,6         | 15,3           | 2024,4         | 15,2           | 2026,3         | 15,3           | 2038,9         | 15,4           |
| 67  | 2025,3         | 14,9           | 2177,6         | 14,6           | 2218,1         | 14,5           | 2216,5         | 14,6           | 2226,5         | 14,7           |
| 68  | 2227,7         | 14,2           | 2389,3         | 13,9           | 2433,9         | 13,8           | 2428,1         | 13,9           | 2434,8         | 14,0           |
| 69  | 2453,7         | 13,5           | 2625,3         | 13,2           | 2674,4         | 13,1           | 2663,6         | 13,2           | 2666,4         | 13,3           |
| 70  | 2706,4         | 12,8           | 2888,5         | 12,6           | 2942,7         | 12,5           | 2925,9         | 12,6           | 2924,0         | 12,7           |
| 71  | 2989,0         | 12,2           | 3182,3         | 11,9           | 3242,2         | 11,8           | 3218,4         | 12,0           | 3210,8         | 12,1           |
| 72  | 3305,4         | 11,5           | 3510,5         | 11,3           | 3576,8         | 11,2           | 3544,6         | 11,3           | 3530,2         | 11,4           |
| 73  | 3659,8         | 10,9           | 3877,4         | 10,7           | 3950,8         | 10,6           | 3908,8         | 10,7           | 3886,2         | 10,8           |
| 74  | 4057,1         | 10,3           | 4287,8         | 10,1           | 4369,2         | 10,0           | 4315,5         | 10,1           | 4283,3         | 10,2           |
| 75  | 4502,8         | 9,7            | 4747,1         | 9,5            | 4837,5         | 9,4            | 4770,1         | 9,5            | 4726,4         | 9,7            |
| 76  | 5002,9         | 9,1            | 5261,4         | 9,0            | 5361,9         | 8,9            | 5278,4         | 9,0            | 5221,2         | 9,1            |
| 77  | 5564,6         | 8,6            | 5837,7         | 8,4            | 5949,5         | 8,3            | 5847,2         | 8,5            | 5773,9         | 8,6            |
| 78  | 6195,6         | 8,0            | 6483,8         | 7,9            | 6608,4         | 7,8            | 6483,9         | 7,9            | 6391,6         | 8,0            |
| 79  | 6905,0         | 7,5            | 7208,5         | 7,4            | 7347,4         | 7,3            | 7197,0         | 7,4            | 7082,5         | 7,5            |
| 80  | 7703,0         | 7,0            | 8021,7         | 6,9            | 8176,8         | 6,8            | 7996,1         | 6,9            | 7855,4         | 7,1            |
| 81  | 8600,8         | 6,5            | 8934,7         | 6,4            | 9107,9         | 6,4            | 8891,8         | 6,5            | 8720,5         | 6,6            |
| 82  | 9611,5         | 6,1            | 9960,2         | 6,0            | 10153,8        | 5,9            | 9896,4         | 6,0            | 9689,2         | 6,2            |
| 83  | 10749,7        | 5,6            | 11112,4        | 5,6            | 11329,0        | 5,5            | 11023,5        | 5,6            | 10774,2        | 5,7            |
| 84  | 12032,0        | 5,2            | 12407,4        | 5,2            | 12650,0        | 5,1            | 12288,4        | 5,2            | 11990,0        | 5,3            |
| 85  | 13477,0        | 4,8            | 13863,4        | 4,8            | 14135,3        | 4,7            | 13708,4        | 4,8            | 13352,6        | 4,9            |
| 86  | 15105,9        | 4,5            | 15500,8        | 4,4            | 15805,7        | 4,3            | 15302,9        | 4,5            | 14880,3        | 4,6            |
| 87  | 16942,6        | 4,1            | 17342,8        | 4,1            | 17685,0        | 4,0            | 17093,9        | 4,1            | 16593,4        | 4,2            |
| 88  | 19014,0        | 3,8            | 19415,3        | 3,7            | 19799,5        | 3,7            | 19105,9        | 3,8            | 18514,9        | 3,9            |
| 89  | 21348,6        | 3,5            | 21745,7        | 3,4            | 22177,2        | 3,4            | 21364,8        | 3,5            | 20668,5        | 3,6            |
| 90  | 23972,1        | 3,2            | 24358,1        | 3,1            | 24842,8        | 3,1            | 23892,9        | 3,2            | 23074,8        | 3,3            |
| 91  | 26918,0        | 2,9            | 27284,3        | 2,9            | 27828,8        | 2,8            | 26720,3        | 2,9            | 25761,3        | 3,0            |
| 92  | 30226,0        | 2,6            | 30562,1        | 2,6            | 31173,7        | 2,6            | 29882,2        | 2,7            | 28760,5        | 2,7            |
| 93  | 33940,4        | 2,4            | 34233,6        | 2,4            | 34920,7        | 2,3            | 33418,2        | 2,4            | 32108,9        | 2,5            |
| 94  | 38111,3        | 2,2            | 38346,1        | 2,1            | 39118,0        | 2,1            | 37372,7        | 2,2            | 35847,2        | 2,3            |
| 95  | 42794,8        | 1,9            | 42952,8        | 1,9            | 43819,8        | 1,9            | 41795,2        | 2,0            | 40020,6        | 2,0            |
| 96  | 48053,8        | 1,7            | 48112,8        | 1,7            | 49086,8        | 1,7            | 46741,0        | 1,7            | 44679,9        | 1,8            |
| 97  | 53959,1        | 1,4            | 53892,8        | 1,4            | 54986,8        | 1,4            | 52272,0        | 1,4            | 49881,7        | 1,5            |
| 98  | 60590,1        | 1,0            | 60367,1        | 1,0            | 61596,0        | 1,0            | 58457,5        | 1,1            | 55689,1        | 1,1            |
| 99  | 68036,0        | 0,5            | 67619,1        | 0,5            | 68999,6        | 0,5            | 65375,0        | 0,5            | 62172,7        | 0,5            |
