# Supplementary material for: Deprivation-specific life tables using multivariable flexible modelling – trends from 2000–2002 to 2010–2012, Portugal
Source: Springer Nature journal article supplement (doi:10.1186/s12889-019-6579-6), 2019-03-07
Supplement: MOESM4 [file 16532626]

**Table S3 - Life tables by deprivation quintile (1-Least deprived) for men in the period 2010-2012 (m\_x - mortality rate; e\_x - life expectancy at age x).**

| age | EDI = 1 |      | EDI = 2 |      | EDI = 3 |      | EDI = 4 |      | EDI = 5 |      |
|-----|---------|------|---------|------|---------|------|---------|------|---------|------|
|     | m_x     | e_x  | m_x     | e_x  | m_x     | e_x  | m_x     | e_x  | m_x     | e_x  |
| 0   | 185,4   | 78,8 | 238,7   | 77,8 | 243,9   | 77,5 | 273,5   | 77,4 | 322,3   | 76,7 |
| 1   | 27,7    | 77,9 | 35,5    | 76,9 | 36,3    | 76,7 | 40,6    | 76,6 | 47,8    | 76,0 |
| 2   | 15,6    | 76,9 | 20,0    | 76,0 | 20,5    | 75,7 | 22,9    | 75,6 | 26,9    | 75,0 |
| 3   | 12,7    | 75,9 | 16,2    | 75,0 | 16,6    | 74,7 | 18,5    | 74,6 | 21,7    | 74,0 |
| 4   | 10,7    | 75,0 | 13,6    | 74,0 | 13,9    | 73,7 | 15,5    | 73,6 | 18,1    | 73,0 |
| 5   | 9,3     | 74,0 | 11,9    | 73,0 | 12,1    | 72,7 | 13,5    | 72,7 | 15,8    | 72,1 |
| 6   | 8,5     | 73,0 | 10,7    | 72,0 | 11,0    | 71,7 | 12,2    | 71,7 | 14,2    | 71,1 |
| 7   | 8,0     | 72,0 | 10,1    | 71,0 | 10,3    | 70,8 | 11,4    | 70,7 | 13,3    | 70,1 |
| 8   | 7,8     | 71,0 | 9,9     | 70,0 | 10,1    | 69,8 | 11,2    | 69,7 | 13,0    | 69,1 |
| 9   | 8,0     | 70,0 | 10,0    | 69,0 | 10,3    | 68,8 | 11,3    | 68,7 | 13,2    | 68,1 |
| 10  | 8,5     | 69,0 | 10,6    | 68,0 | 10,9    | 67,8 | 12,0    | 67,7 | 13,9    | 67,1 |
| 11  | 9,3     | 68,0 | 11,7    | 67,1 | 12,0    | 66,8 | 13,2    | 66,7 | 15,2    | 66,1 |
| 12  | 10,7    | 67,0 | 13,3    | 66,1 | 13,6    | 65,8 | 15,0    | 65,7 | 17,3    | 65,1 |
| 13  | 12,5    | 66,0 | 15,6    | 65,1 | 15,9    | 64,8 | 17,5    | 64,7 | 20,1    | 64,1 |
| 14  | 14,9    | 65,0 | 18,6    | 64,1 | 19,0    | 63,8 | 20,8    | 63,7 | 23,9    | 63,1 |
| 15  | 18,1    | 64,0 | 22,4    | 63,1 | 22,9    | 62,8 | 25,1    | 62,8 | 28,8    | 62,2 |
| 16  | 22,0    | 63,0 | 27,2    | 62,1 | 27,8    | 61,8 | 30,4    | 61,8 | 34,8    | 61,2 |
| 17  | 26,7    | 62,1 | 33,0    | 61,1 | 33,7    | 60,9 | 36,8    | 60,8 | 42,1    | 60,2 |
| 18  | 32,2    | 61,1 | 39,7    | 60,1 | 40,6    | 59,9 | 44,1    | 59,8 | 50,4    | 59,2 |
| 19  | 38,2    | 60,1 | 46,9    | 59,2 | 48,0    | 58,9 | 52,2    | 58,8 | 59,5    | 58,3 |
| 20  | 44,3    | 59,1 | 54,4    | 58,2 | 55,6    | 57,9 | 60,3    | 57,9 | 68,7    | 57,3 |
| 21  | 50,1    | 58,1 | 61,2    | 57,2 | 62,6    | 57,0 | 67,8    | 56,9 | 77,1    | 56,3 |
| 22  | 55,1    | 57,2 | 67,3    | 56,3 | 68,8    | 56,0 | 74,4    | 55,9 | 84,4    | 55,4 |
| 23  | 59,4    | 56,2 | 72,3    | 55,3 | 74,0    | 55,0 | 79,9    | 55,0 | 90,5    | 54,4 |
| 24  | 63,0    | 55,2 | 76,5    | 54,3 | 78,3    | 54,1 | 84,3    | 54,0 | 95,4    | 53,5 |
| 25  | 66,0    | 54,3 | 79,9    | 53,4 | 81,8    | 53,1 | 87,9    | 53,1 | 99,3    | 52,5 |
| 26  | 68,5    | 53,3 | 82,7    | 52,4 | 84,7    | 52,2 | 90,9    | 52,1 | 102,5   | 51,6 |
| 27  | 70,8    | 52,3 | 85,3    | 51,5 | 87,3    | 51,2 | 93,6    | 51,2 | 105,3   | 50,6 |
| 28  | 73,1    | 51,4 | 87,9    | 50,5 | 90,0    | 50,2 | 96,3    | 50,2 | 108,2   | 49,7 |
| 29  | 75,9    | 50,4 | 91,0    | 49,5 | 93,1    | 49,3 | 99,5    | 49,3 | 111,6   | 48,7 |
| 30  | 79,3    | 49,5 | 94,9    | 48,6 | 97,1    | 48,3 | 103,6   | 48,3 | 116,0   | 47,8 |
| 31  | 83,9    | 48,5 | 100,1   | 47,6 | 102,5   | 47,4 | 109,2   | 47,4 | 122,0   | 46,8 |
| 32  | 89,7    | 47,5 | 106,8   | 46,7 | 109,3   | 46,4 | 116,2   | 46,4 | 129,6   | 45,9 |
| 33  | 96,7    | 46,6 | 114,8   | 45,7 | 117,6   | 45,5 | 124,8   | 45,5 | 139,0   | 45,0 |
| 34  | 105,0   | 45,6 | 124,4   | 44,8 | 127,3   | 44,5 | 134,9   | 44,5 | 150,0   | 44,0 |
| 35  | 114,6   | 44,7 | 135,5   | 43,8 | 138,7   | 43,6 | 146,7   | 43,6 | 162,9   | 43,1 |
| 36  | 125,6   | 43,7 | 148,0   | 42,9 | 151,6   | 42,7 | 160,1   | 42,6 | 177,4   | 42,2 |
| 37  | 137,8   | 42,8 | 162,1   | 42,0 | 166,0   | 41,7 | 175,0   | 41,7 | 193,6   | 41,2 |
| 38  | 151,3   | 41,8 | 177,5   | 41,0 | 181,7   | 40,8 | 191,3   | 40,8 | 211,3   | 40,3 |
| 39  | 165,8   | 40,9 | 194,0   | 40,1 | 198,7   | 39,9 | 208,8   | 39,9 | 230,2   | 39,4 |
| 40  | 181,1   | 40,0 | 211,4   | 39,2 | 216,5   | 38,9 | 227,1   | 38,9 | 250,0   | 38,5 |
| 41  | 196,8   | 39,0 | 229,2   | 38,3 | 234,8   | 38,0 | 245,9   | 38,0 | 270,2   | 37,6 |
| 42  | 213,0   | 38,1 | 247,5   | 37,3 | 253,5   | 37,1 | 265,0   | 37,1 | 290,7   | 36,7 |
| 43  | 229,7   | 37,2 | 266,2   | 36,4 | 272,7   | 36,2 | 284,6   | 36,2 | 311,6   | 35,8 |
| 44  | 246,9   | 36,3 | 285,4   | 35,5 | 292,4   | 35,3 | 304,7   | 35,3 | 333,1   | 34,9 |
| 45  | 264,8   | 35,4 | 305,4   | 34,6 | 312,8   | 34,4 | 325,5   | 34,4 | 355,2   | 34,0 |
| 46  | 283,6   | 34,5 | 326,2   | 33,7 | 334,1   | 33,5 | 347,1   | 33,5 | 378,1   | 33,1 |
| 47  | 303,3   | 33,5 | 348,0   | 32,8 | 356,6   | 32,6 | 369,8   | 32,6 | 402,1   | 32,2 |
| 48  | 324,4   | 32,6 | 371,3   | 32,0 | 380,4   | 31,7 | 393,8   | 31,8 | 427,5   | 31,4 |
| 49  | 347,1   | 31,8 | 396,3   | 31,1 | 406,0   | 30,8 | 419,7   | 30,9 | 454,8   | 30,5 |

**Table S3 (cont.) - Life tables by deprivation quintile (1-Least deprived) for men in the period 2010-2012**  
**(m<sub>x</sub> - mortality rate; e<sub>x</sub> - life expectancy at age x).**

| age | EDI = 1        |                | EDI = 2        |                | EDI = 3        |                | EDI = 4        |                | EDI = 5        |                |
|-----|----------------|----------------|----------------|----------------|----------------|----------------|----------------|----------------|----------------|----------------|
|     | m <sub>x</sub> | e <sub>x</sub> | m <sub>x</sub> | e <sub>x</sub> | m <sub>x</sub> | e <sub>x</sub> | m <sub>x</sub> | e <sub>x</sub> | m <sub>x</sub> | e <sub>x</sub> |
| 50  | 371,8          | 30,9           | 423,5          | 30,2           | 433,9          | 30,0           | 447,7          | 30,0           | 484,4          | 29,6           |
| 51  | 398,9          | 30,0           | 453,3          | 29,3           | 464,5          | 29,1           | 478,5          | 29,2           | 516,8          | 28,8           |
| 52  | 428,9          | 29,1           | 486,1          | 28,5           | 498,1          | 28,2           | 512,3          | 28,3           | 552,3          | 27,9           |
| 53  | 461,9          | 28,2           | 522,2          | 27,6           | 535,2          | 27,4           | 549,5          | 27,4           | 591,4          | 27,1           |
| 54  | 498,3          | 27,3           | 562,0          | 26,7           | 576,0          | 26,5           | 590,4          | 26,6           | 634,4          | 26,2           |
| 55  | 538,5          | 26,5           | 605,9          | 25,9           | 621,0          | 25,7           | 635,5          | 25,7           | 681,7          | 25,4           |
| 56  | 583,0          | 25,6           | 654,3          | 25,0           | 670,7          | 24,8           | 685,1          | 24,9           | 733,7          | 24,6           |
| 57  | 632,1          | 24,8           | 707,8          | 24,2           | 725,5          | 24,0           | 739,9          | 24,1           | 791,0          | 23,8           |
| 58  | 686,6          | 23,9           | 766,8          | 23,4           | 786,1          | 23,2           | 800,4          | 23,2           | 854,2          | 22,9           |
| 59  | 746,9          | 23,1           | 832,1          | 22,5           | 853,1          | 22,3           | 867,1          | 22,4           | 923,8          | 22,1           |
| 60  | 813,8          | 22,2           | 904,4          | 21,7           | 927,2          | 21,5           | 941,0          | 21,6           | 1000,8         | 21,3           |
| 61  | 888,0          | 21,4           | 984,5          | 20,9           | 1009,4         | 20,7           | 1022,6         | 20,8           | 1085,7         | 20,5           |
| 62  | 970,4          | 20,6           | 1073,2         | 20,1           | 1100,4         | 19,9           | 1113,0         | 20,0           | 1179,7         | 19,8           |
| 63  | 1062,0         | 19,8           | 1171,6         | 19,3           | 1201,4         | 19,1           | 1213,1         | 19,2           | 1283,6         | 19,0           |
| 64  | 1163,9         | 19,0           | 1280,9         | 18,6           | 1313,5         | 18,4           | 1324,1         | 18,5           | 1398,7         | 18,2           |
| 65  | 1277,3         | 18,2           | 1402,3         | 17,8           | 1438,1         | 17,6           | 1447,2         | 17,7           | 1526,1         | 17,5           |
| 66  | 1403,7         | 17,5           | 1537,2         | 17,0           | 1576,6         | 16,8           | 1584,0         | 17,0           | 1667,5         | 16,7           |
| 67  | 1544,6         | 16,7           | 1687,4         | 16,3           | 1730,7         | 16,1           | 1735,9         | 16,2           | 1824,3         | 16,0           |
| 68  | 1701,8         | 16,0           | 1854,6         | 15,6           | 1902,3         | 15,4           | 1904,9         | 15,5           | 1998,4         | 15,3           |
| 69  | 1877,4         | 15,2           | 2040,9         | 14,8           | 2093,5         | 14,7           | 2092,8         | 14,8           | 2191,9         | 14,6           |
| 70  | 2073,6         | 14,5           | 2248,6         | 14,1           | 2306,7         | 14,0           | 2302,1         | 14,1           | 2407,0         | 13,9           |
| 71  | 2292,9         | 13,8           | 2480,4         | 13,4           | 2544,6         | 13,3           | 2535,3         | 13,4           | 2646,3         | 13,2           |
| 72  | 2538,4         | 13,1           | 2739,1         | 12,8           | 2810,2         | 12,6           | 2795,3         | 12,7           | 2912,7         | 12,6           |
| 73  | 2813,2         | 12,4           | 3028,2         | 12,1           | 3107,0         | 12,0           | 3085,4         | 12,1           | 3209,4         | 11,9           |
| 74  | 3121,1         | 11,8           | 3351,4         | 11,5           | 3438,7         | 11,3           | 3409,2         | 11,4           | 3540,2         | 11,3           |
| 75  | 3466,3         | 11,1           | 3712,9         | 10,8           | 3809,9         | 10,7           | 3770,9         | 10,8           | 3909,1         | 10,7           |
| 76  | 3853,5         | 10,5           | 4117,6         | 10,2           | 4225,4         | 10,1           | 4175,2         | 10,2           | 4320,8         | 10,1           |
| 77  | 4288,1         | 9,9            | 4570,7         | 9,6            | 4690,6         | 9,5            | 4627,2         | 9,6            | 4780,4         | 9,5            |
| 78  | 4776,2         | 9,3            | 5078,5         | 9,1            | 5212,0         | 8,9            | 5132,9         | 9,1            | 5293,8         | 9,0            |
| 79  | 5324,5         | 8,7            | 5647,6         | 8,5            | 5796,4         | 8,4            | 5699,1         | 8,5            | 5867,6         | 8,4            |
| 80  | 5941,0         | 8,2            | 6286,0         | 8,0            | 6452,0         | 7,9            | 6333,1         | 8,0            | 6509,2         | 7,9            |
| 81  | 6634,2         | 7,6            | 7002,3         | 7,5            | 7187,6         | 7,3            | 7043,4         | 7,5            | 7227,0         | 7,4            |
| 82  | 7414,3         | 7,1            | 7806,4         | 7,0            | 8013,4         | 6,9            | 7839,6         | 7,0            | 8030,2         | 6,9            |
| 83  | 8292,3         | 6,6            | 8709,5         | 6,5            | 8940,9         | 6,4            | 8732,4         | 6,5            | 8929,4         | 6,5            |
| 84  | 9281,0         | 6,2            | 9724,0         | 6,0            | 9982,9         | 5,9            | 9733,9         | 6,1            | 9936,5         | 6,0            |
| 85  | 10394,7        | 5,7            | 10864,1        | 5,6            | 11154,0        | 5,5            | 10857,8        | 5,6            | 11064,8        | 5,6            |
| 86  | 11649,6        | 5,3            | 12145,8        | 5,2            | 12470,7        | 5,1            | 12119,2        | 5,2            | 12329,2        | 5,2            |
| 87  | 13064,1        | 4,9            | 13587,1        | 4,8            | 13951,3        | 4,7            | 13535,6        | 4,8            | 13746,7        | 4,8            |
| 88  | 14658,9        | 4,5            | 15208,3        | 4,4            | 15616,9        | 4,3            | 15126,4        | 4,5            | 15336,0        | 4,4            |
| 89  | 16456,0        | 4,1            | 17030,9        | 4,1            | 17489,4        | 4,0            | 16911,9        | 4,1            | 17116,9        | 4,1            |
| 90  | 18475,1        | 3,8            | 19073,5        | 3,7            | 19588,1        | 3,7            | 18909,8        | 3,8            | 19106,4        | 3,7            |
| 91  | 20741,9        | 3,5            | 21361,2        | 3,4            | 21938,8        | 3,4            | 21143,9        | 3,4            | 21327,2        | 3,4            |
| 92  | 23286,8        | 3,2            | 23923,3        | 3,1            | 24571,5        | 3,1            | 23641,8        | 3,1            | 23806,1        | 3,1            |
| 93  | 26144,0        | 2,8            | 26792,6        | 2,8            | 27520,1        | 2,8            | 26434,9        | 2,8            | 26573,1        | 2,8            |
| 94  | 29351,8        | 2,6            | 30006,1        | 2,5            | 30822,6        | 2,5            | 29557,9        | 2,5            | 29661,7        | 2,5            |
| 95  | 32953,1        | 2,2            | 33605,1        | 2,2            | 34521,4        | 2,2            | 33049,9        | 2,3            | 33109,3        | 2,3            |
| 96  | 36996,3        | 1,9            | 37635,6        | 1,9            | 38664,0        | 1,9            | 36954,4        | 1,9            | 36957,6        | 1,9            |
| 97  | 41535,6        | 1,6            | 42149,7        | 1,6            | 43303,8        | 1,5            | 41320,3        | 1,6            | 41253,2        | 1,6            |
| 98  | 46631,9        | 1,1            | 47205,1        | 1,1            | 48500,4        | 1,1            | 46201,9        | 1,1            | 46048,1        | 1,1            |
| 99  | 52353,4        | 0,5            | 52866,8        | 0,5            | 54320,6        | 0,5            | 51660,2        | 0,5            | 51400,4        | 0,5            |
